# Supplementary material
Source: PubMed Central journal article supplement (PMC6171524)
Supplement: NIHMS1503973-supplement-1.pdf [file NIHMS1503973-supplement-1.pdf]

# SUPPLEMENTAL TABLES AND FIGURES

## Supplemental Table 1

|                                            | SD-101 Dose |        | 1 mg (n=10) |        | 2 mg (n=3) |        | 4 mg (n=3) |     | 8 mg (n=13) |     | Total (n=29) |     |       |
|--------------------------------------------|-------------|--------|-------------|--------|------------|--------|------------|-----|-------------|-----|--------------|-----|-------|
|                                            | Grade       | 1/2    | 3           | 1/2    | 3          | 1/2    | 3          | 1/2 | 3           | 1/2 | 3            | ALL |       |
| Anemia                                     |             | 0      | 0           | 1 (33) | 0          | 0      | 0          | 0   | 1 (8)       | 0   | 2 (7)        | 0   | 2 (7) |
| Anxiety                                    |             | 1 (10) | 0           | 0      | 0          | 0      | 0          | 0   | 1 (8)       | 0   | 2 (7)        | 0   | 2 (7) |
| Back Pain                                  |             | 0      | 0           | 1 (33) | 0          | 1 (33) | 0          | 0   | 0           | 0   | 2 (7)        | 0   | 2 (7) |
| Constipation                               |             | 1 (10) | 0           | 0      | 0          | 0      | 0          | 0   | 1 (8)       | 0   | 2 (7)        | 0   | 2 (7) |
| Flu-like Illness                           |             | 0      | 0           | 0      | 0          | 0      | 0          | 0   | 2 (15)      | 0   | 2 (7)        | 0   | 2 (7) |
| Hyperbilirubinemia                         |             | 0      | 0           | 1 (33) | 0          | 1 (33) | 0          | 0   | 0           | 0   | 2 (7)        | 0   | 2 (7) |
| Hyperhidrosis (Sweating)                   |             | 0      | 0           | 1 (33) | 0          | 0      | 0          | 0   | 1 (8)       | 0   | 2 (7)        | 0   | 2 (7) |
| Injection Site Pain                        |             | 0      | 0           | 0      | 0          | 0      | 0          | 0   | 2 (15)      | 0   | 2 (7)        | 0   | 2 (7) |
| Injection Site Rash                        |             | 1 (10) | 0           | 0      | 0          | 0      | 0          | 0   | 1 (8)       | 0   | 2 (7)        | 0   | 2 (7) |
| Rash                                       |             | 2 (20) | 0           | 0      | 0          | 0      | 0          | 0   | 0           | 0   | 2 (7)        | 0   | 2 (7) |
| Abdominal Discomfort                       |             | 0      | 0           | 1 (33) | 0          | 0      | 0          | 0   | 0           | 0   | 1 (3)        | 0   | 1 (3) |
| Abdominal Pain                             |             | 0      | 0           | 0      | 0          | 0      | 0          | 0   | 1 (8)       | 0   | 1 (3)        | 0   | 1 (3) |
| Abdominal Pain Upper                       |             | 1 (10) | 0           | 0      | 0          | 0      | 0          | 0   | 0           | 0   | 1 (3)        | 0   | 1 (3) |
| Arthralgia                                 |             | 0      | 0           | 0      | 0          | 0      | 0          | 0   | 1 (8)       | 0   | 1 (3)        | 0   | 1 (3) |
| AST Increase                               |             | 0      | 0           | 0      | 0          | 0      | 0          | 0   | 1 (8)       | 0   | 1 (3)        | 0   | 1 (3) |
| Asthenia                                   |             | 0      | 0           | 0      | 0          | 0      | 0          | 0   | 1 (8)       | 0   | 1 (3)        | 0   | 1 (3) |
| Blood Calcium Decrease                     |             | 0      | 0           | 1 (33) | 0          | 0      | 0          | 0   | 0           | 0   | 1 (3)        | 0   | 1 (3) |
| Blood Chloride Increase                    |             | 0      | 0           | 1 (33) | 0          | 0      | 0          | 0   | 0           | 0   | 1 (3)        | 0   | 1 (3) |
| Chest Discomfort                           |             | 1 (10) | 0           | 0      | 0          | 0      | 0          | 0   | 0           | 0   | 1 (3)        | 0   | 1 (3) |
| Cold Sweat                                 |             | 0      | 0           | 0      | 0          | 0      | 0          | 0   | 1 (8)       | 0   | 1 (3)        | 0   | 1 (3) |
| Confusion                                  |             | 0      | 0           | 0      | 0          | 0      | 0          | 0   | 1 (8)       | 0   | 1 (3)        | 0   | 1 (3) |
| Cough                                      |             | 0      | 0           | 0      | 0          | 0      | 0          | 0   | 1 (8)       | 0   | 1 (3)        | 0   | 1 (3) |
| Dizziness                                  |             | 1 (10) | 0           | 0      | 0          | 0      | 0          | 0   | 0           | 0   | 1 (3)        | 0   | 1 (3) |
| DNA Antibody Positive                      |             | 0      | 0           | 0      | 0          | 0      | 0          | 0   | 1 (8)       | 0   | 1 (3)        | 0   | 1 (3) |
| Dry Eye                                    |             | 1 (10) | 0           | 0      | 0          | 0      | 0          | 0   | 0           | 0   | 1 (3)        | 0   | 1 (3) |
| Dysgeusia                                  |             | 0      | 0           | 0      | 0          | 0      | 0          | 0   | 1 (8)       | 0   | 1 (3)        | 0   | 1 (3) |
| Eosinophil Count Decrease                  |             | 0      | 0           | 1 (33) | 0          | 0      | 0          | 0   | 0           | 0   | 1 (3)        | 0   | 1 (3) |
| Erythema                                   |             | 0      | 0           | 0      | 0          | 1 (33) | 0          | 0   | 0           | 0   | 1 (3)        | 0   | 1 (3) |
| Exercise Tolerance Decrease                |             | 1 (10) | 0           | 0      | 0          | 0      | 0          | 0   | 0           | 0   | 1 (3)        | 0   | 1 (3) |
| Eye Irritation                             |             | 1 (10) | 0           | 0      | 0          | 0      | 0          | 0   | 0           | 0   | 1 (3)        | 0   | 1 (3) |
| GGT Increase                               |             | 0      | 0           | 0      | 0          | 0      | 0          | 0   | 1 (8)       | 0   | 1 (3)        | 0   | 1 (3) |
| Herpes Virus Infection                     |             | 1 (10) | 0           | 0      | 0          | 0      | 0          | 0   | 0           | 0   | 1 (3)        | 0   | 1 (3) |
| Hot Flash                                  |             | 1 (10) | 0           | 0      | 0          | 0      | 0          | 0   | 0           | 0   | 1 (3)        | 0   | 1 (3) |
| hyperglycemia                              |             | 0      | 0           | 0      | 0          | 0      | 0          | 0   | 1 (8)       | 0   | 1 (3)        | 0   | 1 (3) |
| Hypotension                                |             | 0      | 0           | 0      | 0          | 0      | 0          | 0   | 1 (8)       | 0   | 1 (3)        | 0   | 1 (3) |
| Increased Viscosity of Bronchial Secretion |             | 0      | 0           | 0      | 0          | 0      | 0          | 0   | 1 (8)       | 0   | 1 (3)        | 0   | 1 (3) |
| Injection Site Discoloration               |             | 0      | 0           | 0      | 0          | 0      | 0          | 0   | 1 (8)       | 0   | 1 (3)        | 0   | 1 (3) |
| Leukopenia                                 |             | 0      | 0           | 0      | 0          | 0      | 0          | 0   | 1 (8)       | 0   | 1 (3)        | 0   | 1 (3) |
| Lymphadenopathy Increase                   |             | 0      | 0           | 1 (33) | 0          | 0      | 0          | 0   | 0           | 0   | 1 (3)        | 0   | 1 (3) |
| Lymphocyte Count Decrease                  |             | 0      | 0           | 1 (33) | 0          | 0      | 0          | 0   | 0           | 0   | 1 (3)        | 0   | 1 (3) |
| Lymphocyte Count Increase                  |             | 0      | 0           | 0      | 0          | 1 (33) | 0          | 0   | 0           | 0   | 1 (3)        | 0   | 1 (3) |
| Maculo-Papular Rash                        |             | 0      | 0           | 0      | 0          | 1 (33) | 0          | 0   | 0           | 0   | 1 (3)        | 0   | 1 (3) |
| Medial Tibial Stress Syndrome              |             | 1 (10) | 0           | 0      | 0          | 0      | 0          | 0   | 0           | 0   | 1 (3)        | 0   | 1 (3) |
| Menstruation Irregular                     |             | 0      | 0           | 1 (33) | 0          | 0      | 0          | 0   | 0           | 0   | 1 (3)        | 0   | 1 (3) |
| Muscle Spasms                              |             | 1 (10) | 0           | 0      | 0          | 0      | 0          | 0   | 0           | 0   | 1 (3)        | 0   | 1 (3) |
| Neck Pain                                  |             | 0      | 0           | 1 (33) | 0          | 0      | 0          | 0   | 0           | 0   | 1 (3)        | 0   | 1 (3) |
| Oral Hypoesthesia                          |             | 1 (10) | 0           | 0      | 0          | 0      | 0          | 0   | 0           | 0   | 1 (3)        | 0   | 1 (3) |
| Oral Paraesthesia                          |             | 1 (10) | 0           | 0      | 0          | 0      | 0          | 0   | 0           | 0   | 1 (3)        | 0   | 1 (3) |
| Peripheral Swelling of Lower Extremities   |             | 0      | 0           | 0      | 0          | 0      | 0          | 0   | 1 (8)       | 0   | 1 (3)        | 0   | 1 (3) |
| Pleuritic Pain                             |             | 0      | 0           | 0      | 0          | 1 (33) | 0          | 0   | 0           | 0   | 1 (3)        | 0   | 1 (3) |
| Presyncope                                 |             | 0      | 0           | 0      | 0          | 0      | 0          | 0   | 1 (8)       | 0   | 1 (3)        | 0   | 1 (3) |
| Skin hyperpigmentation                     |             | 0      | 0           | 0      | 0          | 0      | 0          | 0   | 1 (8)       | 0   | 1 (3)        | 0   | 1 (3) |
| Sneezing                                   |             | 1      | 0           | 0      | 0          | 0      | 0          | 0   | 0           | 0   | 1 (3)        | 0   | 1 (3) |
| Stomatitis                                 |             | 0      | 0           | 0      | 0          | 0      | 0          | 0   | 1 (8)       | 0   | 1 (3)        | 0   | 1 (3) |
| Tachycardia                                |             | 0      | 0           | 0      | 0          | 0      | 0          | 0   | 1 (8)       | 0   | 1 (3)        | 0   | 1 (3) |
| Total Protein Decrease                     |             | 0      | 0           | 1 (33) | 0          | 0      | 0          | 0   | 0           | 0   | 1 (3)        | 0   | 1 (3) |
| Urinary Incontinence                       |             | 0      | 0           | 0      | 0          | 0      | 0          | 0   | 1 (8)       | 0   | 1 (3)        | 0   | 1 (3) |

### Supplemental Table 1: Uncommon Drug-related Adverse Events

Drug-related adverse events that occurred in less than 10% of patients

**Supplemental Table 2**

| <b>Tumor Subtype</b> | <b>Initial Tumor Burden<br/>(sum of cross products<br/>sum of cm x cm )</b> | <b>Stage</b> | <b>FLIPI</b> | <b>Flu-like<br/>Symptom<br/>(Highest Grade)</b> | <b>Best Overall<br/>Response</b> | <b>Best Distant<br/>Response</b> |
|----------------------|-----------------------------------------------------------------------------|--------------|--------------|-------------------------------------------------|----------------------------------|----------------------------------|
| FOLLICULAR           | 133.64                                                                      | STAGE IV     | 2            | 1                                               | -23                              | -21                              |
| FOLLICULAR           | 19.22                                                                       | STAGE IV     | 2            | 3                                               | -41                              | -38                              |
| FOLLICULAR           | 24.77                                                                       | STAGE IV     | 3            | 3                                               | -21                              | -18                              |
| FOLLICULAR           | 27.77                                                                       | STAGE III    | 1            | 3                                               | -37                              | -8                               |
| FOLLICULAR           | 6.73                                                                        | STAGE III    | 1            | 2                                               | -22                              | -3                               |
| FOLLICULAR           | 9.21                                                                        | STAGE III    | 2            | 2                                               | -72                              | -53                              |
| FOLLICULAR           | 25.5                                                                        | STAGE IV     | 2            | 2                                               | -20                              | -19                              |
| MARGINAL ZONE        | 26.88                                                                       | STAGE III    | N/A          | 3                                               | -48                              | -29                              |
| FOLLICULAR           | 23.74                                                                       | STAGE IV     | 2            | 3                                               | -1                               | 13                               |
| FOLLICULAR           | 23.59                                                                       | STAGE IV     | 3            | 3                                               | -17                              | 14                               |
| FOLLICULAR           | 8.38                                                                        | STAGE IV     | 2            | 2                                               | -70                              | -61                              |
| FOLLICULAR           | 18.59                                                                       | STAGE IV     | 2            | 2                                               | -25                              | -16                              |
| FOLLICULAR           | 18.19                                                                       | STAGE III    | 3            | 2                                               | -53                              | -49                              |
| MARGINAL ZONE        | 30.88                                                                       | STAGE IV     | N/A          | 2                                               | -12                              | -5                               |
| MARGINAL ZONE        | 38.18                                                                       | STAGE IV     | N/A          | 2                                               | 30                               | 25                               |
| CUTANEOUS            | 3.68                                                                        | STAGE IV     | N/A          | 2                                               | -82                              | -61                              |
| FOLLICULAR           | 6.55                                                                        | STAGE IV     | 1            | 3                                               | -50                              | -5                               |
| MARGINAL ZONE        | 7.11                                                                        | STAGE II     | N/A          | 2                                               | -2                               | -3                               |
| SLL                  | 34.41                                                                       | STAGE IV     | N/A          | 1                                               | -19                              | -14                              |
| FOLLICULAR           | 30.32                                                                       | STAGE IV     | 3            | 1                                               | -59                              | -52                              |
| FOLLICULAR           | 19.89                                                                       | STAGE IV     | 3            | 1                                               | -59                              | -56                              |
| FOLLICULAR           | 8.03                                                                        | STAGE IV     | 2            | 2                                               | -17                              | -28                              |
| CLL                  | 21.48                                                                       | STAGE IV     | N/A          | 2                                               | -13                              | -13                              |
| FOLLICULAR           | 19.91                                                                       | STAGE IV     | 2            | 2                                               | 3                                | 7                                |
| FOLLICULAR           | 12.44                                                                       | STAGE III    | 3            | 2                                               | -73                              | -67                              |
| FOLLICULAR           | 79.72                                                                       | STAGE IV     | 2            | 2                                               | 5                                | 45                               |
| SLL                  | 72.05                                                                       | STAGE IV     | N/A          | 2                                               | -28                              | -20                              |
| FOLLICULAR           | 21.91                                                                       | STAGE II     | 2            | 1                                               | -45                              | -21                              |
| FOLLICULAR           | 12.43                                                                       | STAGE II     | 0            | 2                                               | -45                              | -39                              |

**Supplemental Table 2: Initial Tumor Burden, Stage, FLIPI, and the Grade of Flu-like symptoms do not correlate to the best overall or distant response.**

The initial tumor burden, stage, follicular lymphoma international prognostic index (for those patients with FL), nor the development of the flu-like symptoms (malaise, chills, headache, fatigue, and fever) during therapy correlated with either overall or distant response.

**Supplemental Table 3**

| Cohort (Dose) | Subject ID  | Time (hrs) |       |      |      |      |      |
|---------------|-------------|------------|-------|------|------|------|------|
|               |             | 0          | 1     | 2    | 4    | 6    | 24   |
| 1<br>(1 mg)   | Patient #1  | BLOQ       | 29.40 | BLOQ | BLOQ | BLOQ | BLOQ |
|               | Patient #2  | BLOQ       | BLOQ  | BLOQ | BLOQ | BLOQ | BLOQ |
|               | Patient #3  | 27.3       | 35.6  | BLOQ | 25.3 | BLOQ | 29.0 |
| 2<br>(2 mg)   | Patient #4  | BLOQ       | BLOQ  | 26.7 | BLOQ | BLOQ | BLOQ |
|               | Patient #5  | BLOQ       | BLOQ  | BLOQ | BLOQ | BLOQ | BLOQ |
|               | Patient #6  | BLOQ       | BLOQ  | BLOQ | BLOQ | BLOQ | BLOQ |
| 3<br>(4 mg)   | Patient #7  | BLOQ       | 58.8  | BLOQ | BLOQ | 28.4 | BLOQ |
|               | Patient #8  | BLOQ       | 52.9  | BLOQ | BLOQ | BLOQ | BLOQ |
|               | Patient #9  | BLOQ       | 50.7  | BLOQ | BLOQ | BLOQ | BLOQ |
| 4<br>(8 mg)   | Patient #10 | BLOQ       | 99.8  | BLOQ | BLOQ | BLOQ | BLOQ |
|               | Patient #11 | BLOQ       | 139   | BLOQ | BLOQ | BLOQ | BLOQ |
|               | Patient #13 | BLOQ       | BLOQ  | 57.5 | BLOQ | BLOQ | BLOQ |

**Supplemental Table 3: Concentration of SD-101 in plasma samples before and after the second intratumoral administration**

The concentration (in ng/ml) of SD-101 was measured in the plasma at baseline, 1, 2, 4, 6, and 24 hours after treatment. BLOQ = below the limit of quantitation, which was 25 ng/mL except for samples from patients 6, 8, and 13, where the LLOQ was 50 ng/mL, and samples from patient 11 where the LLOQ was 100 ng/mL.

**Supplemental Figure 1**

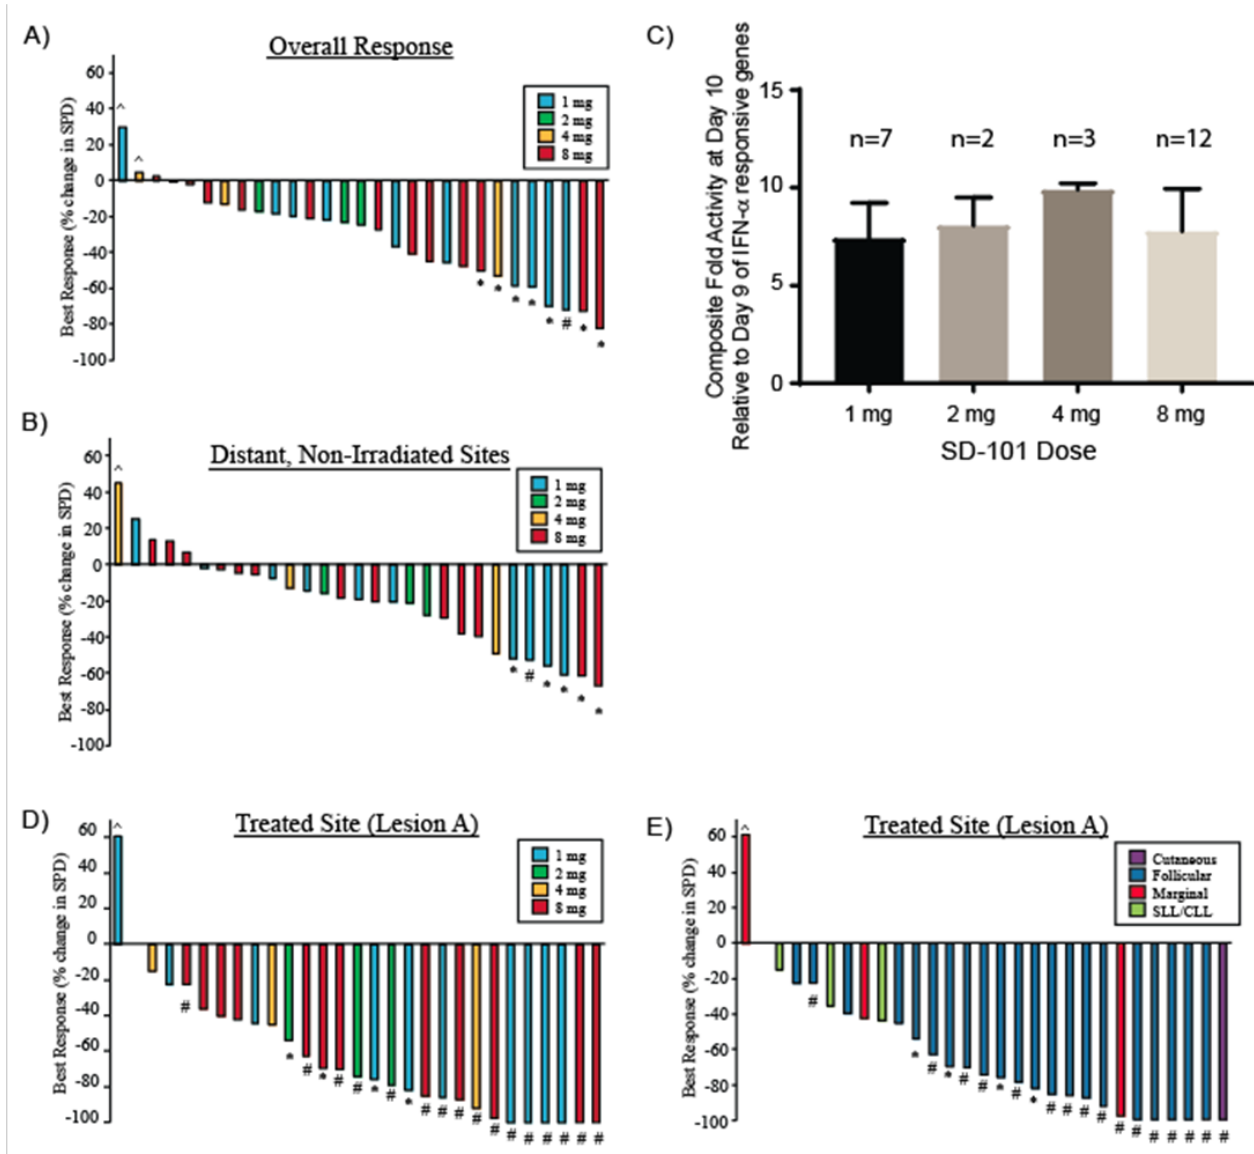

**Supplemental Figure 1. SD-101 and low-dose radiation induces clinical responses in patients with indolent lymphoma independent of SD-101 dose.**

Waterfall plot showing the best overall change in the sum of the product of the diameters in all target lesions (A), or distal sites (B) by dose. Relative fold activity  $\pm$  SEM of the expression of IFN- $\alpha$  regulated genes at Day 10, 24 hours after injection with SD-101. Fold activity represents a composite score of the geometric mean of the fold activity of 4 IFN-regulated genes (GBP-1, ISG-54, MCP-1, and MxB) relative to baseline (Day 9) for each subject followed by calculating the arithmetic mean of the geometric means within each cohort. The number of

patients included for each dose level are shown. (C) Waterfall plot showing the best overall change in the sum of the product of the diameters in the treated site by dose (D) and lymphoma subtype (E). Patients achieving a partial response (\*), complete response (#), or progression (^) by the Revised 2007 International Working Group criteria are shown.

## Supplemental Figure 2

Lesion A Response in Relation to Distal Lesions Response

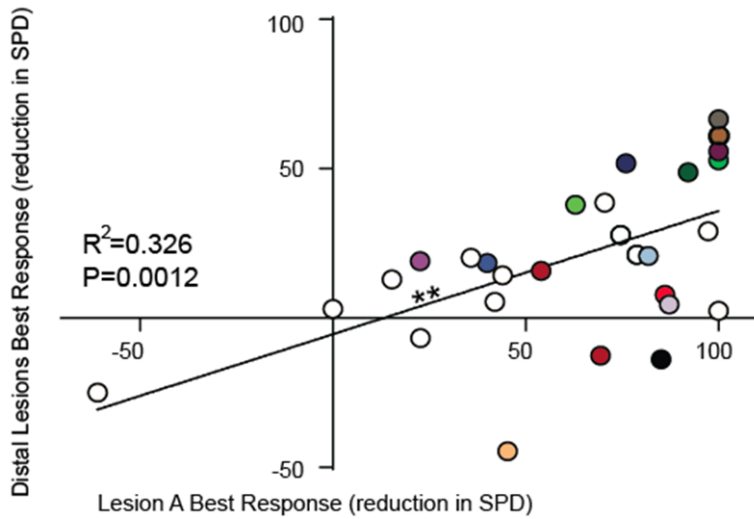

### Supplemental Figure 2: Lesion A tumor response correlates with Distal Lesion response

The best overall reduction of the treated site, Lesion A, positively correlated to the best overall reduction of the distal lesions as measured by the sum of the product of the diameters by linear regression analysis ( $p=0.0012$ ). Patient, who have samples available for the immune response analysis, are tracked by a specific color.

### Supplemental Figure 3

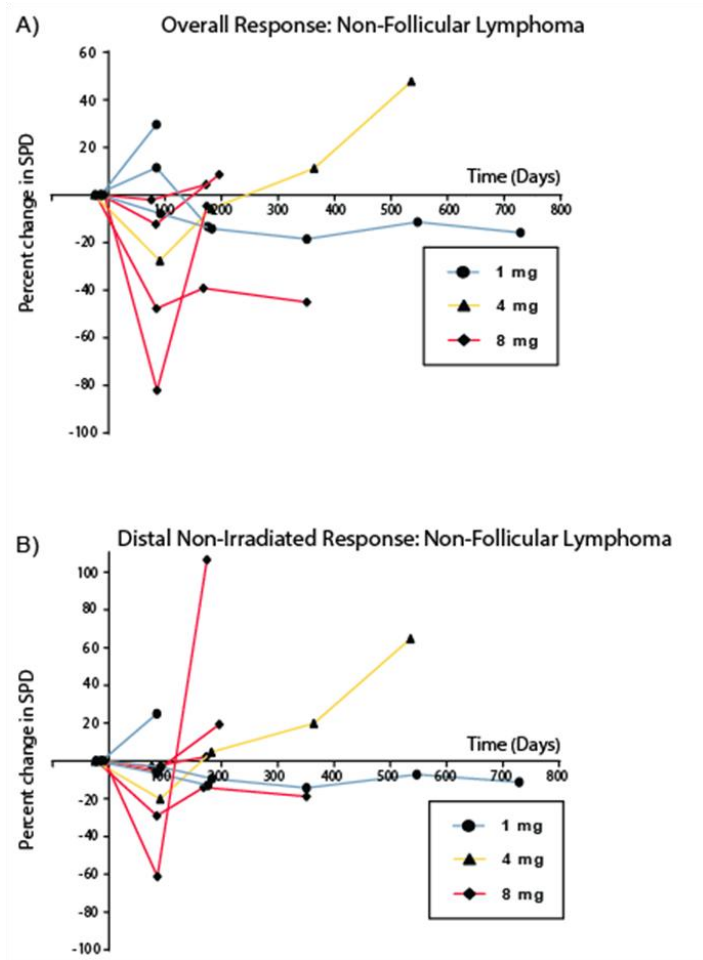

**Supplemental Figure 3: Spider plots for patients with non-Follicular Lymphoma subtypes after treatment with SD-101 and low-dose radiation**

Spider plots showing the change in the sum of the product of the diameters in all lesions (A) or distal sites (excluding Lesion A) (B) in non-Follicular lymphoma subtypes by SD-101 dose .

## Supplemental Figure 4

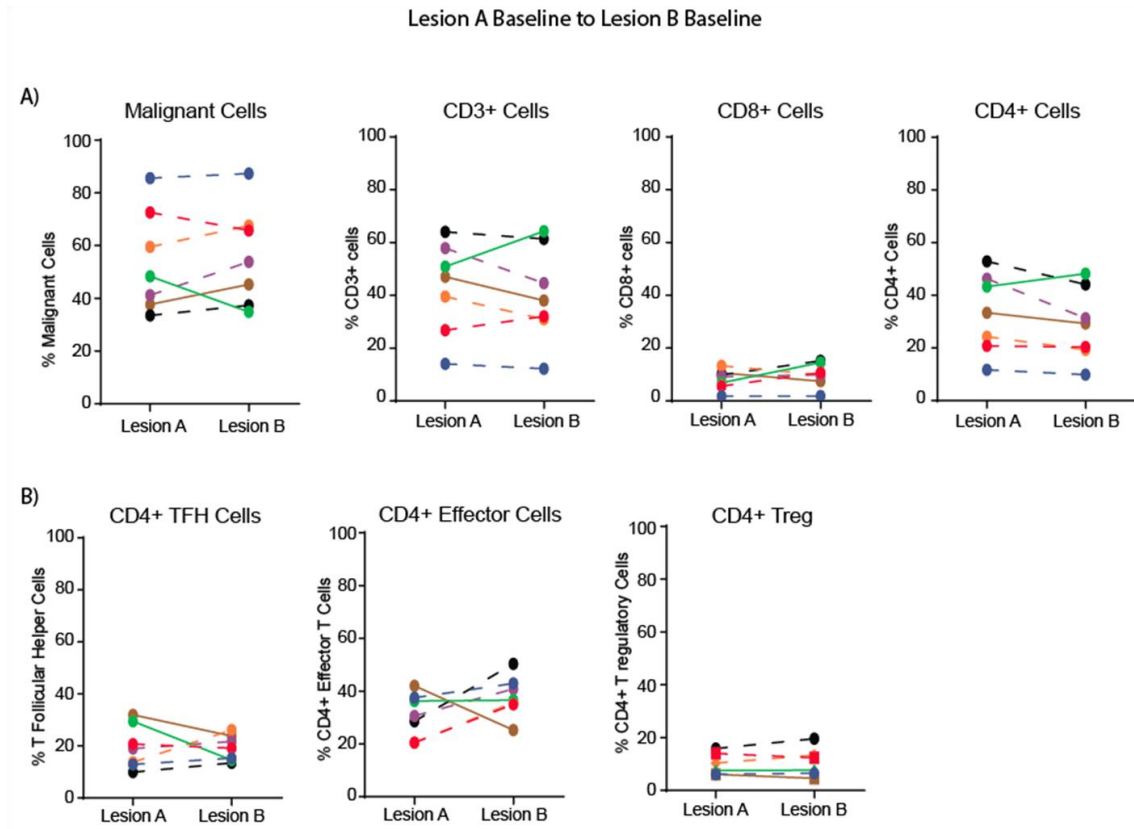

### Supplemental Figure 4: Intratumoral immune cell composition is similar between different tumor sites within each patient.

We evaluated the percentage of intratumoral malignant cells, CD3+ cells, CD8+ T-cells, CD4+ T-cells, and CD4+ subsets including TFH cells, Treg cells, and CD4+ effector cells were evaluated prior to treatment in Lesion A and Lesion B in 7 patients who had FNA samples available for analysis. Each patient is tracked by a specific color and patients achieving at least an overall partial response are connected by solid lines and those who did not by dashed lines.



## Supplemental Figure 5

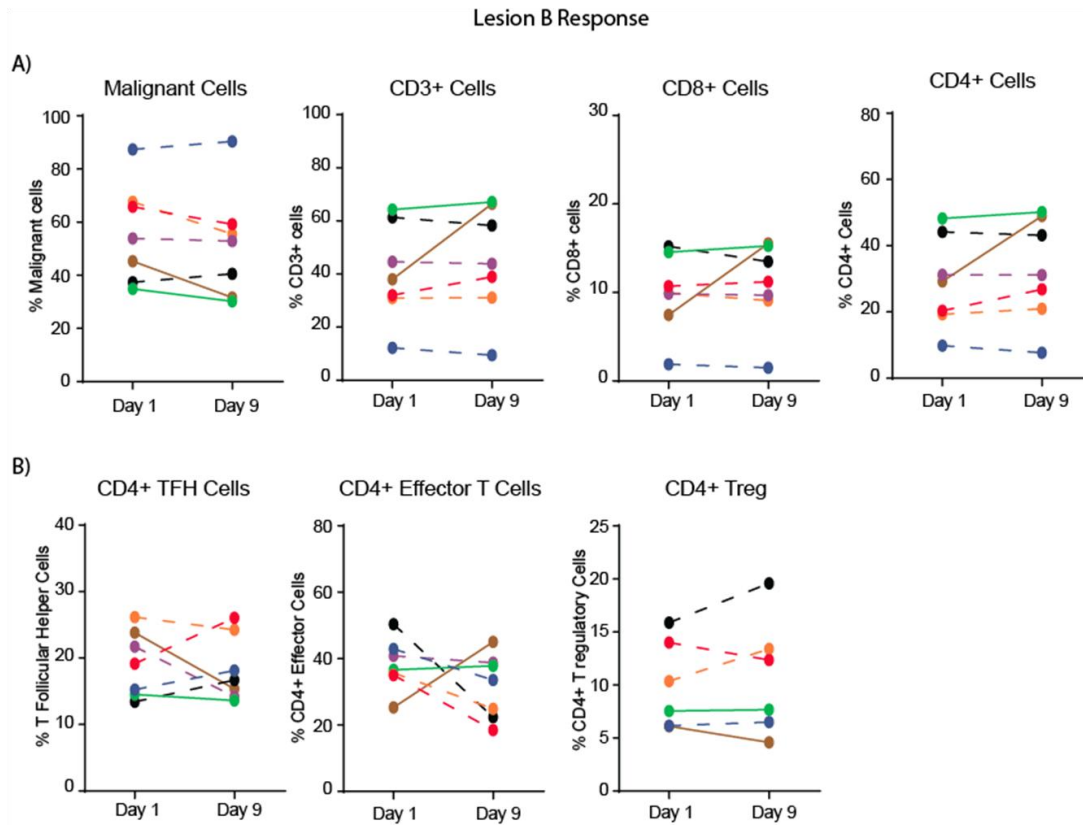

### Supplemental Figure 5: Treatment Induced Immune Cell Changes in Distal Lesions

Malignant cells, CD3+ cells, CD8+ T-cells, and CD4+ T-cells were evaluated pre- (Day 1) and post-treatment (Day 9) from an uninjected, distal lesion. As a percentage of all cells, the percent of intratumoral malignant cells, CD3+, CD8+, and CD4+ T-cells were not significantly different when evaluated by paired t-test. (A) As a percentage of CD3+ T-cells, the CD4+ TFH cells, effector cells, and Tregs were not significantly different when evaluated by paired t-test. (B) Each patient is tracked by a specific color and patients achieving at least an overall partial response are connected by solid lines and those who did not by dashed lines.
